# Supplementary material
Source: PubMed Central journal article supplement (PMC4682895)
Supplement: NIHMS743802-supplement-supplement_1.pdf [file NIHMS743802-supplement-supplement_1.pdf]

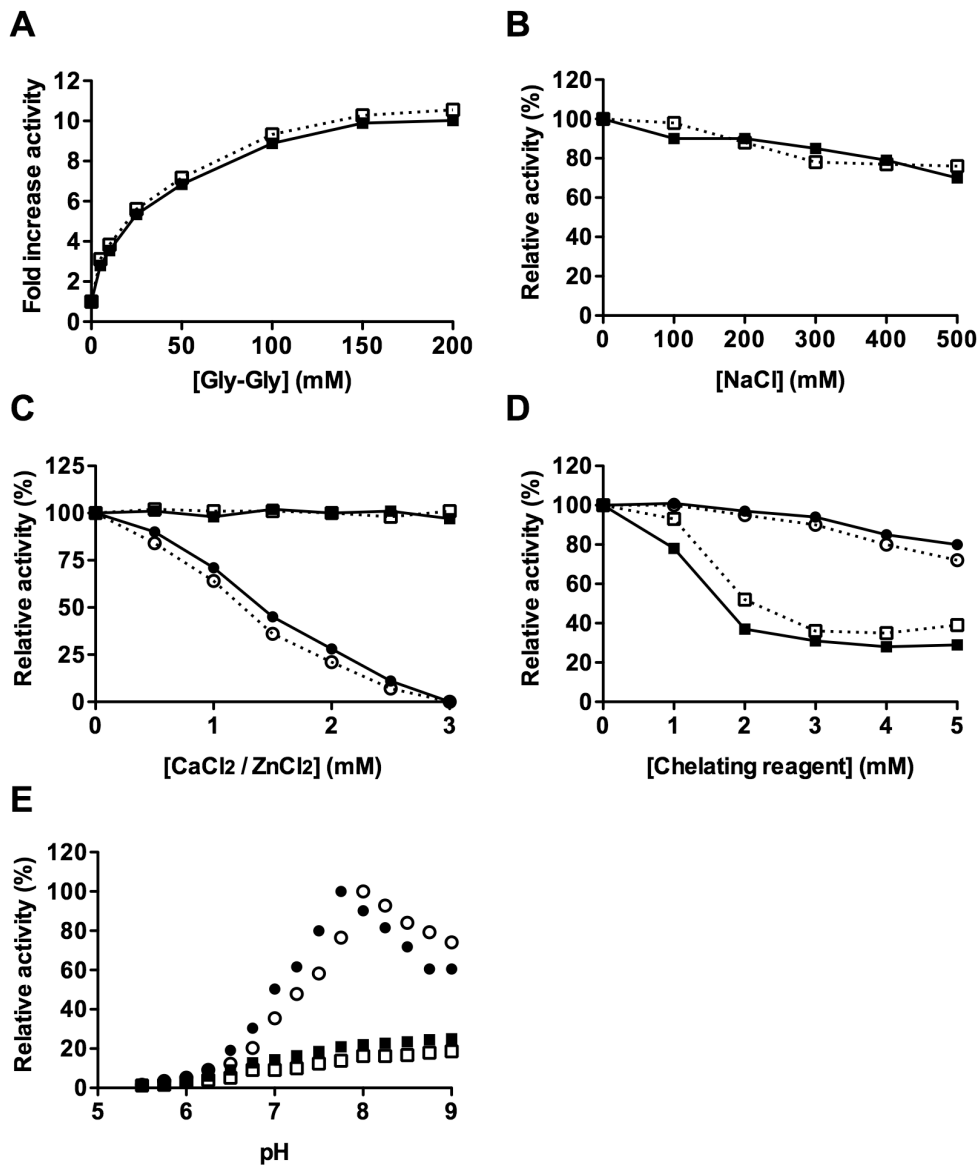

**Supplementary Figure 1. Comparison of biochemical behavior of RgpB-6His and native RgpB.**

The amidolytic activities of Rgp-6His (open symbols) and native RgpB (filled symbols) were determined at 37 °C using the chromogenic substrate L-BAPNA ( $\lambda = 405 \text{ nm}$  ;  $n = 3$ ) in activity buffer (200 mM Tris, 10 mM L-cysteine, pH 7.6) supplemented with increasing concentration of the dipeptide Gly-Gly (A); of NaCl (B); of divalent cations  $\text{Ca}^{2+}$  (square) or  $\text{Zn}^{2+}$  (circle) (C); or of the chelating reagents EDTA (square) and 1,1 orthophenanthroline (circle) (D). Alternatively, the effect of the pH on the amidolytic activity was determined in 0.1 M Tris, 0.05 M MES and 0.05 M acetic acid buffer adjusted from pH 5 to 9 with (circle) or without (square) 50 mM Gly-Gly (E).
